# Supplementary material for: Nature-inspired semi-IPN hydrogels with tunable mechanical properties and multi-responsiveness
Source: Royal Society of Chemistry journal article supplement (doi:10.1039/d0nj04675b), 2020-11-25
Supplement: d0nj04675b11.pdf [file d0nj04675b11.pdf]

## Supporting Information

*for*

### Nature-inspired semi-IPN hydrogels with tunable mechanical property and multi- responsiveness

*Xiaoxu Liang, Hongyao Ding, Qiao Wang, Miaomiao Wang, Bibo Yin,  
Guoxing Sun\**

Joint Key Laboratory of the Ministry of Education, Institute of Applied Physics  
and Materials Engineering, University of Macau, Avenida da Universidade,  
Taipa, Macau SAR, China.

\* Corresponding author. E-mail address: [gxsun@um.edu.mo](mailto:gxsun@um.edu.mo) (G. Sun).

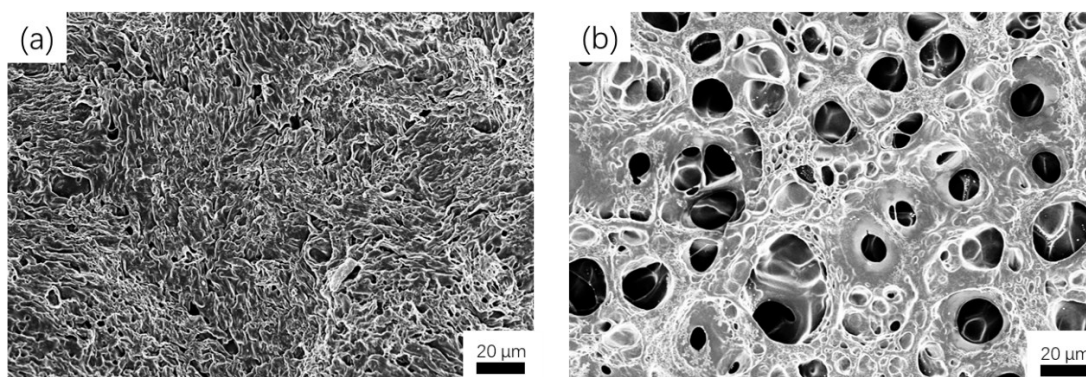

**Fig. S1:** SEM image of (a) PVA and (b) PAP hydrogels (scale bar = 20 μm).

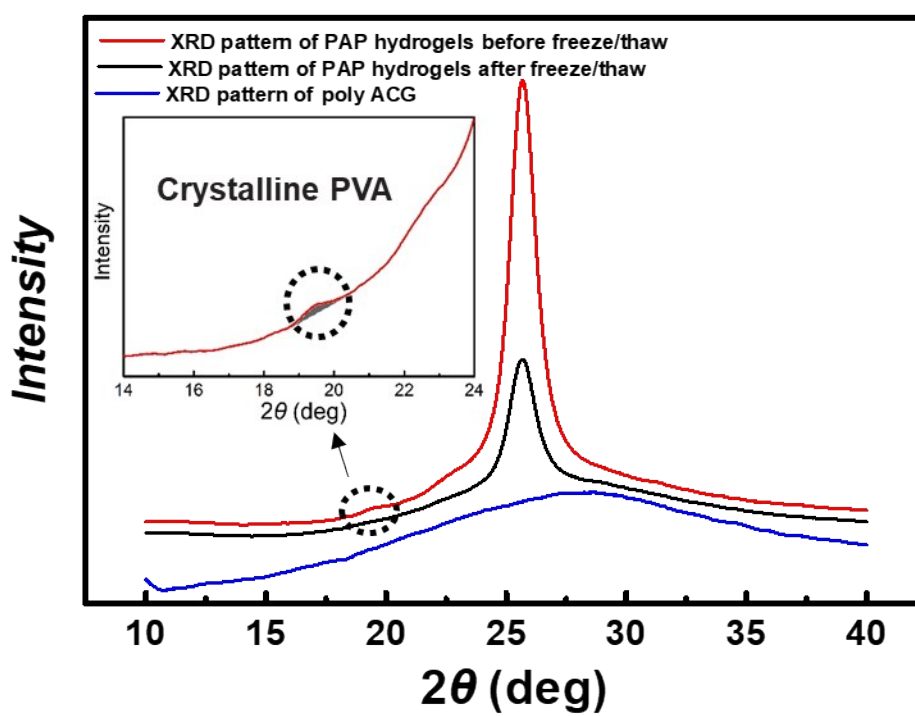

**Fig. S2:** X-ray powder diffraction profiles of poly ACG, as-prepared PAP hydrogels before and after freeze/thaw treatment.

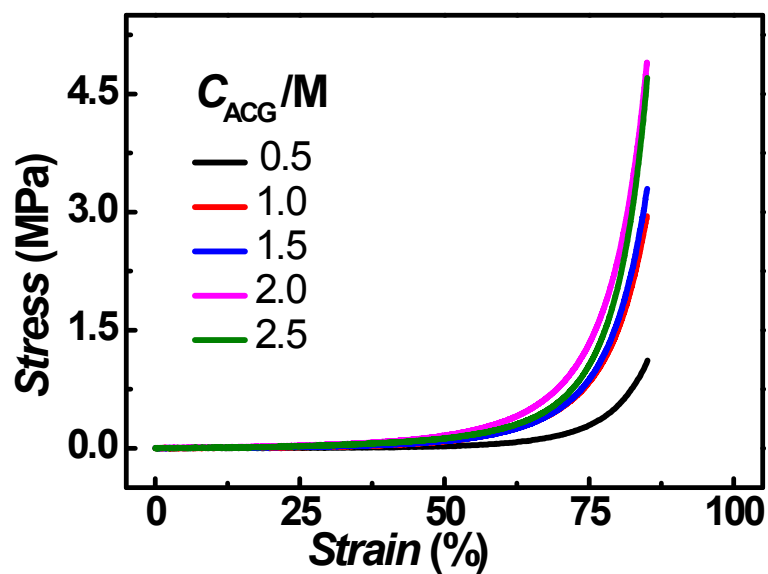

**Fig. S3:** Compression stress-strain curves of the PAP-5.0-  $C_{ACG}$  hydrogels with different ACG content,  $C_{ACG}$ .

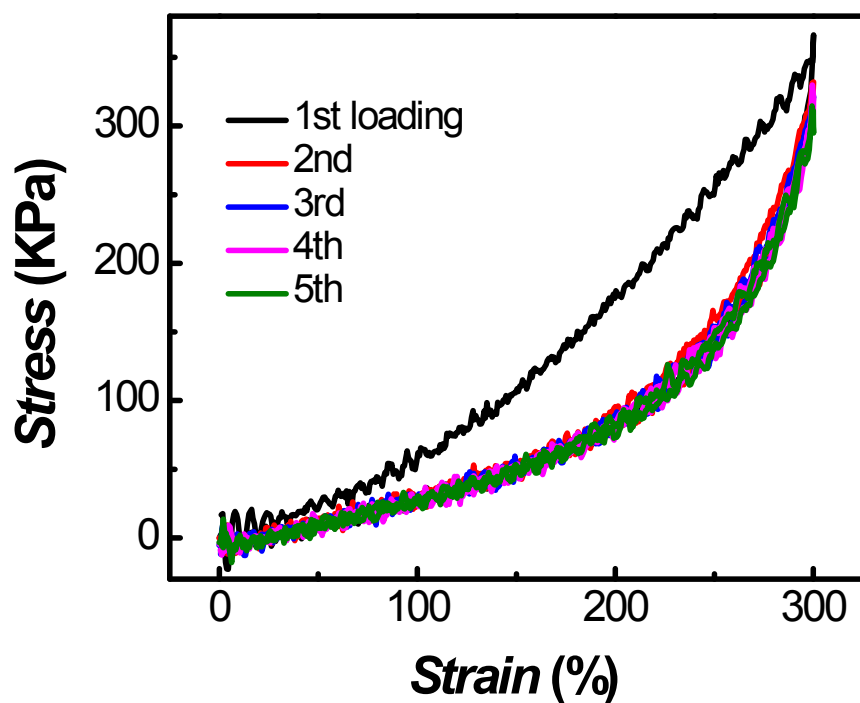

**Fig. S4:** Cyclic elongation stress-strain curves of PAP-5.0-2.0 hydrogels.

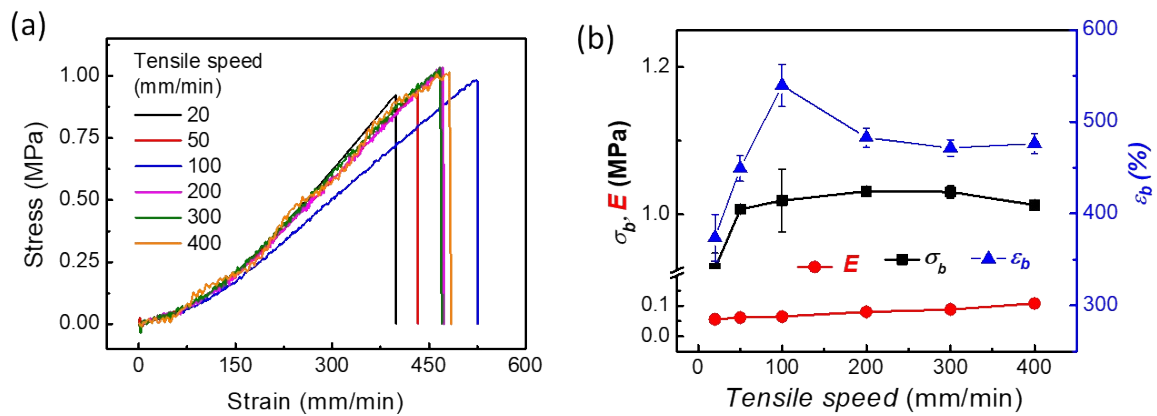

**Fig. S5:** (a, b) Tensile stress-strain curves (a) and corresponding mechanical properties (b) of the PAP-5.0-2.0 hydrogels at different tensile speeds at 20 °C.

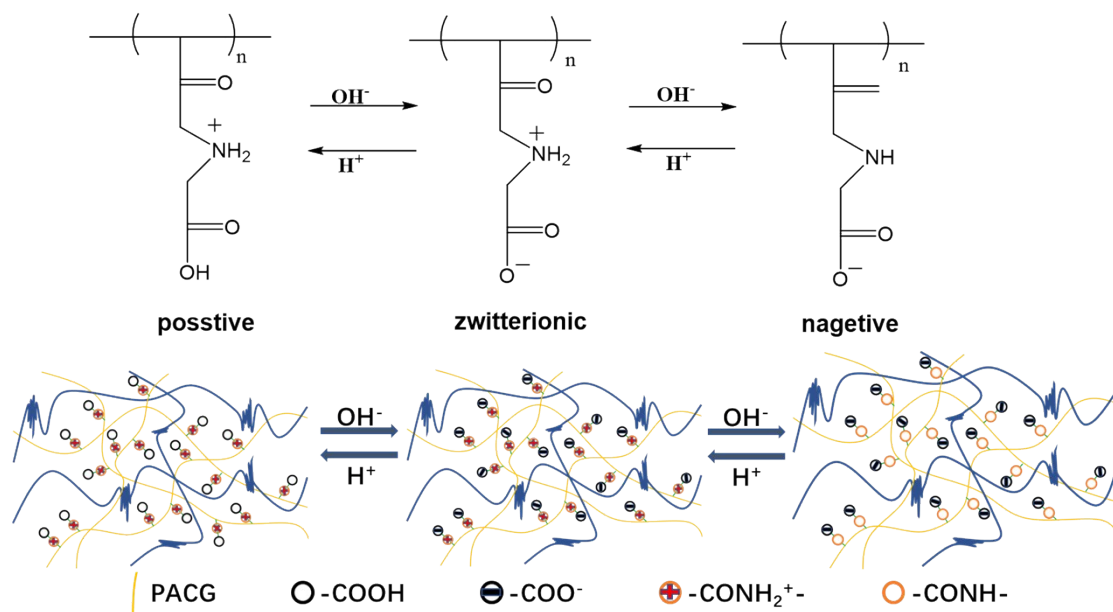

**Fig. S6:** Schematic structures of PAP hydrogels in solutions of different pH value.

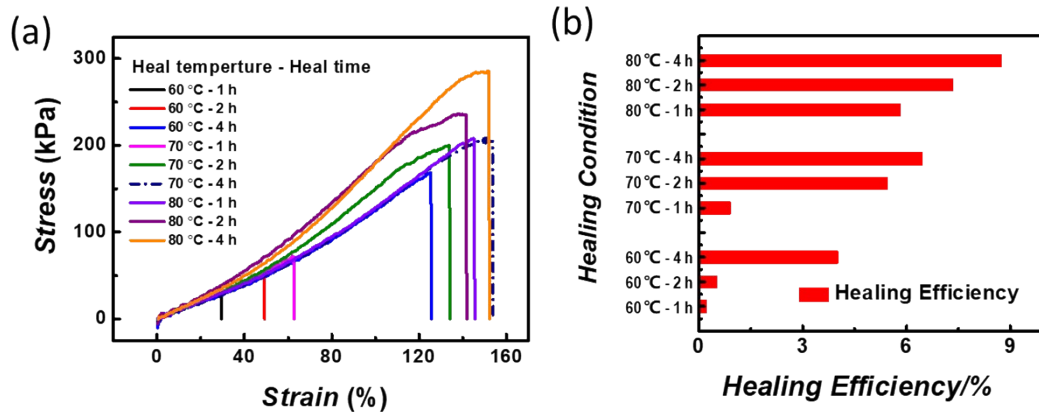

Fig. S7: (a, b) PAP-5.0-2.0 hydrogels tensile stress-strain curves (a) and healing efficiency (b) after healed under different healing conditions.

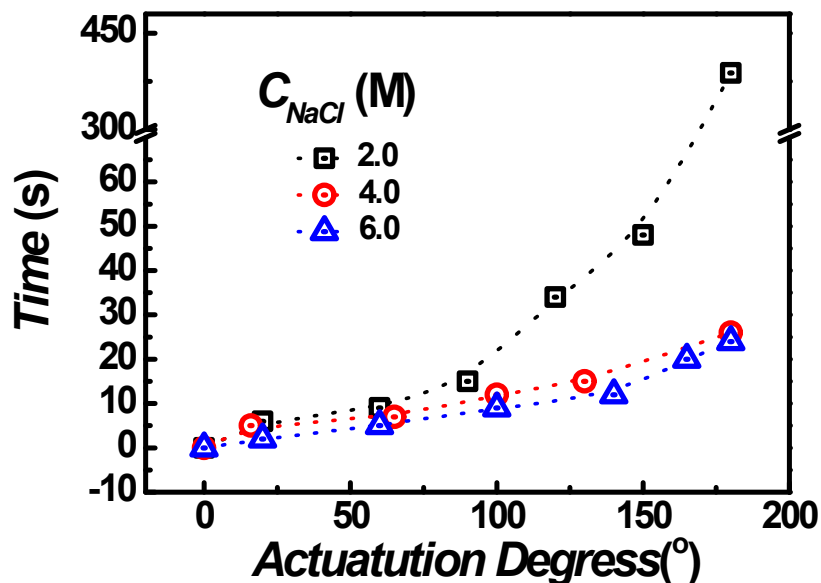

Fig. S8: Actuation degree of the bilayer hydrogels in NaCl solution with different concentrations.

The influence of NaCl concentration on self-rolling speed has been investigated (Fig. S8). The bilayer hydrogels was nonresponsive to the aqueous solution with  $C_{NaCl}$  less than 2.0 M. When  $C_{NaCl}$  increases from 2.0 M to 6.0 M, the rolling speed increases with the increase of salt concentration generally. The rolling speed at 4.0 M salt solution is comparable with that of 6.0 M salt solution, which is consistent with the size variations

in **Fig.6b**. This self-rolling behavior is mainly due to osmotic pressure. As the salt concentration increases, the salting-out effect caused by osmotic pressure acted as the driving force and phase separation occurred, leading to the volume shrinking of the PAP layer, then the bilayer hydrogel bend to the PAP layer side <sup>1,2</sup>.

**Tab. S1** Gel fraction of PAP hydrogels.

| <i>Type</i>        | $C_{PVA}/\%$ | $C_{ACG}/M$ | <i>Designed <math>W_{gf}/\%</math></i> | $W_{gf}/\%$ |
|--------------------|--------------|-------------|----------------------------------------|-------------|
| <i>PAP-5.0-0</i>   | 5.0          | 0           | 5.0                                    | 4.3         |
| <i>PAP-5.0-0.5</i> | 5.0          | 0.5         | 11.8                                   | 11.2        |
| <i>PAP-5.0-1.0</i> | 5.0          | 1.0         | 16.8                                   | 16.1        |
| <i>PAP-5.0-1.5</i> | 5.0          | 1.0         | 21.2                                   | 20.5        |
| <i>PAP-5.0-2.0</i> | 5.0          | 2.0         | 25.2                                   | 24.3        |
| <i>PAP-5.0-2.5</i> | 5.0          | 2.5         | 29.4                                   | 28.5        |
| <i>PAP-2.5-2.0</i> | 2.5          | 2.0         | 23.3                                   | 22.6        |
| <i>PAP-7.5-2.0</i> | 7.5          | 2.0         | 27.2                                   | 26.3        |

The gel fraction of as-prepared hydrogels was determined by the weight change upon drying using an oven with the following steps. First, the weight of as-prepared hydrogel was recorded as  $W_{ap}$  which was measured by an electronic balance. Then the sample was transferred to the oven (110 °C) and heated to a constant weight. The weight of the dried hydrogel was denoted as  $W_d$ . The gel fraction  $W_{gf}$  is defined as the ratio in percentage of the weight of the dried hydrogel to the total weight of the as-prepared hydrogel as shown in Equation S1.

$$W_{gf} = (W_d / W_{ap}) \times 100 \quad \text{Equation S1}$$

**Tab. S2** Comparisons of mechanical properties of hydrogels

| Composition                  | $\sigma_b$ (kPa)     | $\varepsilon_b$ (%) | $E$ (kPa)          | $W_b$ (kJ/m <sup>3</sup> ) | Reference                    |
|------------------------------|----------------------|---------------------|--------------------|----------------------------|------------------------------|
| PAM/PACG                     | $1.38 \times 10^3$   | 530                 | 106                | 308                        | This work                    |
| PVA/SA/Gly                   | $1.25 \times 10^3$   | 516                 | 340                | /                          | (Oudong Hu et al., 2020)     |
| PVA/ARC                      | 35.3                 | /                   | /                  | /                          | (Lei Ding et al., 2020)      |
| PVA/GSP                      | 220                  | 254                 | 35                 | 227.2                      | (Chunhui Luo et al., 2020)   |
| PAM/PVA                      | 270                  | 500                 | /                  | /                          | (Zhang et al., 2016)         |
| PVA/PSBMA                    | 596                  | 275                 | /                  | /                          | (Zhenwu Wang., 2016)         |
| PVA-Borax                    | 123.26               | 528                 | /                  | /                          | (Shengping Dai et al., 2019) |
| PVA/TTSBI                    | $1.23 \times 10^3$   | 774                 | $1.60 \times 10^3$ | /                          | (Xiao Zhang et al., 2019)    |
| TA-PVA/BSA                   | $\sim 3 \times 10^3$ | 410                 | /                  | /                          | (Rongnian Xu et al., 2018)   |
| PVA/AAm/AAC                  | $1.2 \times 10^3$    | 500                 | /                  | $1.2 \times 10^3$          | (Zhengyu Gong et al., 2016)  |
| PVA/PAA/Fe <sup>3+</sup>     | $1.0 \times 10^3$    | 1370                | /                  | $6.37 \times 10^3$         | (Yongzhi Liang et al., 2020) |
| PVA/Glycerol/Polyaniline     | 477                  | 472                 | /                  | /                          | (Chengxin Hu et al., 2018)   |
| PVA/NaCl/glycerol            | 570                  | 575                 | /                  | /                          | (Shuijiao Peng et al., 2018) |
| PVA/TA/CNC                   | $\sim 100$           | $\sim 900$          | /                  | /                          | (Changyou Shao et al., 2019) |
| PVA/NaCl                     | $1.6 \times 10^3$    | 631                 | /                  | /                          | (Yujun Sun et al., 2017)     |
| PVA/PA/NH <sub>2</sub> -POSS | 361                  | 363                 | /                  | /                          | (Liang Shao et al., 2020)    |
| PAM/PVA                      | 183.8                | 488                 | 87                 | /                          | (Gang Ge et al., 2018)       |
| PVA/cellulose                | 37.3                 | 747                 | /                  | /                          | (Yang Wang et al., 2020)     |

Note: '/' indicates 'not shown' in the references.

**Movie S1:** Reversible self-rolling deformation of the bilayer hydrogel strip in saline solution and DI water-3X SPEED

## References

1. X. Jv, X. Zhao, H. Ge, J. Sun, H. Li, Q. Wang and H. Lu, *Journal of Chemical & Engineering Data*, 2019, **64**, 1228-1236.
2. S. Zheng, Y. Tian, X. Zhang, M. Du, Y. Song, Z. Wu and Q. Zheng, *Soft Matter*, 2018, **14**, 5888-5897.
