# Supplementary figures and images for: Nature-inspired semi-IPN hydrogels with tunable mechanical properties and multi-responsiveness
Source: Royal Society of Chemistry journal article supplement (doi:10.1039/d0nj04675b), 2020-11-25

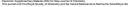

Supplement: d0nj04675b2.pdf [file d0nj04675b2.pdf]

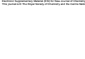

Supplement: d0nj04675b3.pdf [file d0nj04675b3.pdf]

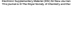

Supplement: d0nj04675b4.pdf [file d0nj04675b4.pdf]

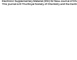

Supplement: d0nj04675b5.pdf [file d0nj04675b5.pdf]

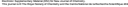

Supplement: d0nj04675b6.pdf [file d0nj04675b6.pdf]

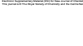

Supplement: d0nj04675b7.pdf [file d0nj04675b7.pdf]

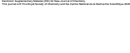

Supplement: d0nj04675b8.pdf [file d0nj04675b8.pdf]

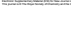

Supplement: d0nj04675b9.pdf [file d0nj04675b9.pdf]
